# Supplementary material for: Cold atmospheric plasma causes a calcium influx in melanoma cells triggering CAP-induced senescence
Source: PubMed Central journal article supplement (PMC6030087; doi:10.1038/s41598-018-28443-5), 2018-07-03

# Cold atmospheric plasma causes a calcium influx in melanoma cells triggering CAP-induced senescence

Christin Schneider<sup>1,#</sup>, Lisa Gebhardt<sup>2,#</sup>, Stephanie Arndt<sup>3</sup>, Sigrid Karrer<sup>3</sup>, Julia L. Zimmermann<sup>4</sup>, Michael J.M. Fischer<sup>2,5</sup>, Anja-Katrin Bosserhoff<sup>1,6\*</sup>

## Supplementary information

**Supplement 1. Schematic figure.** Experimental set up for direct (A) and indirect (B) plasma treatment during Ca<sup>2+</sup> time lapse imaging. PE stands for polyethylene.

**Supplement 2. Excitation spectrum of fura-2 in pbECS is not changed by CAP exposure.** The excitation spectrum of fura-2 diluted in pbECS with and without Ca<sup>2+</sup> was measured before and after treatment with 30 s CAP. The spectra were measured three times and normalized to the isosbestic point at 360 nm. Fluorescence emission was collected above 440 nm (long-pass filter).

**Supplement 3. The majority of the Ca<sup>2+</sup> response is reached faster by indirect CAP treatment than by direct CAP treatment.** A,B) Overlay of cytoplasmic Ca<sup>2+</sup> measurement by direct CAP treatment with 30 s exposure and by indirect CAP treatment with 120 s exposure of Mel Im (A, n = 660 and 485) and Mel Juso (B, n = 492 and 321). For better illustration, the moment of application of the CAP-treated pbECS solution and the start of direct CAP treatment were set at zero. C,D) Calculation of the ratio between  $\Delta 30 \text{ s} / \Delta 180 \text{ s}$ . Data are shown as mean and 99% confidence interval.

**Supplement 4. Application of pbECS treated with CAP for 0–120 s.** The application of untreated pbECS does not trigger a Ca<sup>2+</sup> influx in Mel Im (A, n = 182) and Mel Juso (B, n = 377). In contrast to responses in all cells at the application of pbECS pretreated with CAP for 120 s, only 6% of Mel Im cells (n = 185) react to pbECS pretreated with CAP for 60 s and 2% to CAP for 30 s (n = 252). Mel Juso cells did not respond with Ca<sup>2+</sup> influx when exposed to pbECS pretreated for 60 s and 30 s (n = 305 and 371).

**Supplement 5. CAP exposure causes no membrane damage.** Measurement of intracellular propidium iodide positive cells (PI+) by flow cytometry. PI was added direct after 30 s CAP treatment of Mel Im (**A**, n = 3 experiments) and Mel Juso (**B**, n = 3 experiments). The percentage of PI positive cells of untreated cells was compared to the CAP-treated cells. Representative cytograms of PI fluorescence vs. FL1-H (height) channel fluorescence were exemplary shown. Data are shown as mean  $\pm$  SEM.

**Supplement 6. CAP induces senescence in melanoma cells on different ways.** **A)** Mel Im (n = 3 experiments) and Mel Juso (n = 3 experiments) were simultaneously loaded with the  $\text{Ca}^{2+}$  chelator BAPTA AM (10  $\mu\text{M}$ ) and mRNA expression of p21 and p16 was determined 48 h after CAP treatment and compared with the respective controls with or without BAPTA AM pretreatment. **B,C)** Senescence-associated  $\beta$ -galactosidase staining of Mel Im (n = 5, one run) 48 h after CAP exposure for 30 s with or without BAPTA AM (10  $\mu\text{M}$ ) pretreatment. Representative pictures were taken with a 20x magnification in bright field illumination. Senescent cells showed a blue staining due to senescence-associated  $\beta$ -galactosidase activity. Data are mean  $\pm$  SEM (**C**).

# S1

**A** Direct plasma treatment

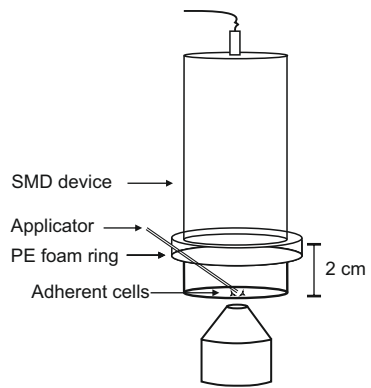

**B** Indirect plasma treatment

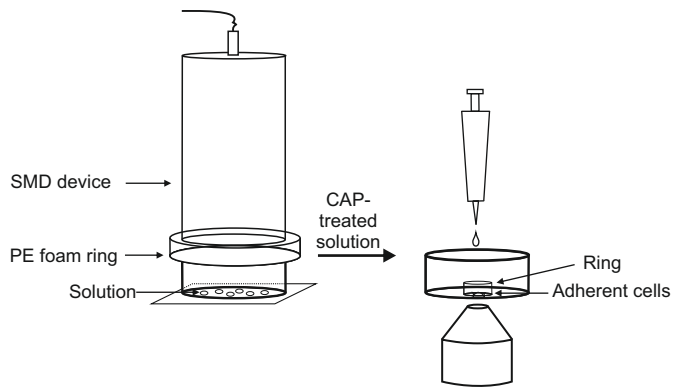

# S2

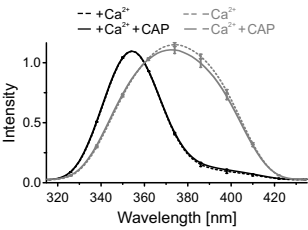

# S3

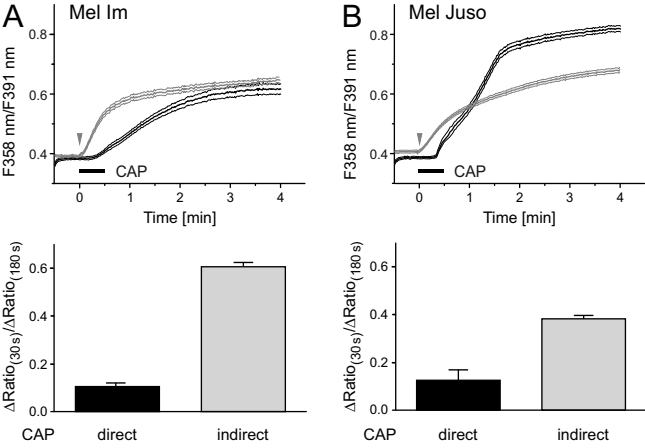

# S4

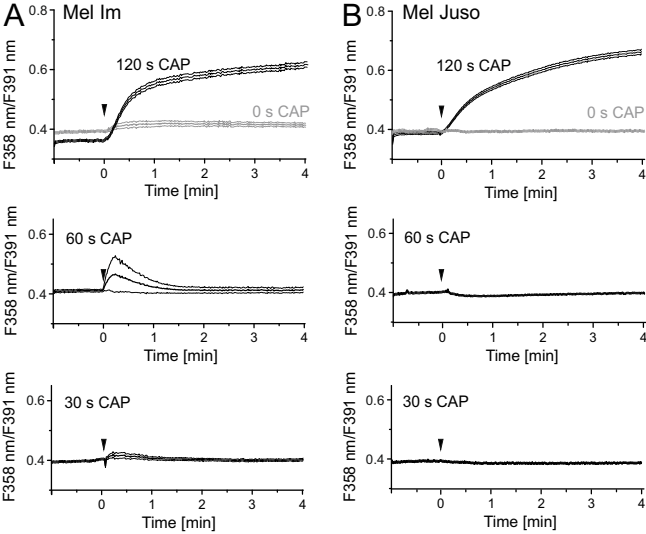

# S5

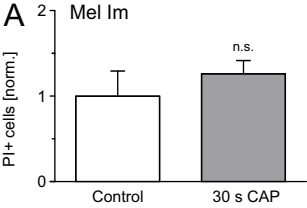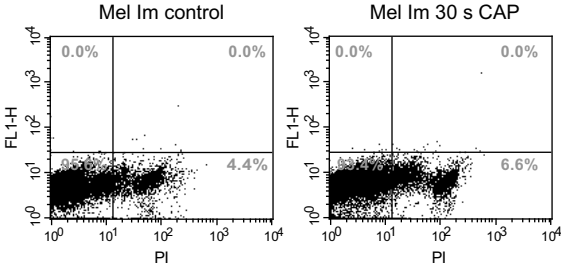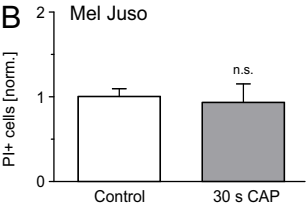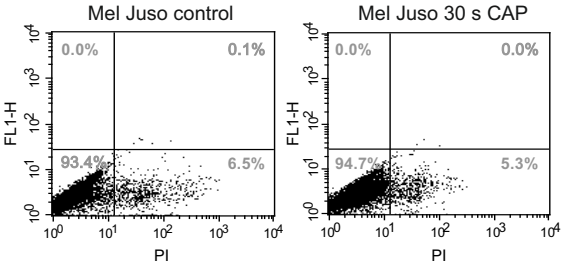

# S6

**A**

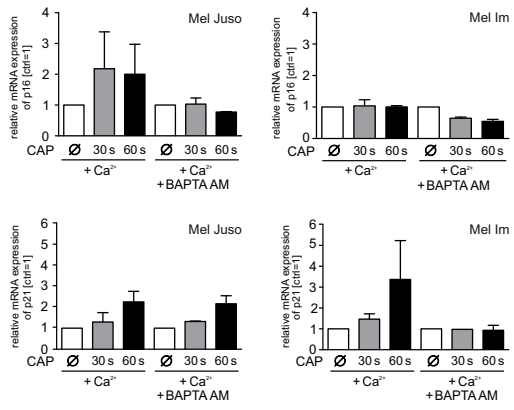

**B**

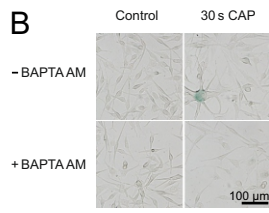

**C**

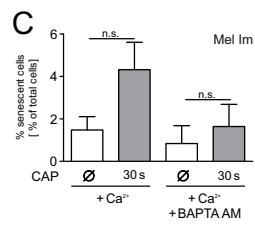

Supplement: 41598_2018_28443_MOESM1_ESM.pdf [file 41598_2018_28443_MOESM1_ESM.pdf]
